# Supplementary material for: Hacia un delito publicitario
Source: HighWire-hosted journal article supplement (doi:10.1136/fmch-2020-000798), 1992-01-01
Supplement: fmch-2020-000798supp001_data_supplement.pdf [file fmch-2020-000798supp001_data_supplement.pdf]

## Semi-structured interview guide

1. Overall, how do you use clinical reasoning when dealing with chronic management of patients suffering from multimorbidity?
2. In your daily practice, can you describe your clinical reasoning when managing these multimorbid patients whose diagnosis you already know?
3. Which steps would you say are involved when it comes to your clinical reasoning processes?
4. According to you, what are the main issues related to this “type” of clinical reasoning?
5. Could you describe what are the differences between the clinical reasoning used when managing chronic patients with longitudinal follow-up and the clinical reasoning used to identify a diagnosis?
6. Which processes seem simple to you, in this “type” of clinical reasoning in your experience?
7. And what are the difficulties?
8. What would be the risks of error in such clinical reasoning? At which steps of the reasoning more precisely would you be more likely to make reasoning errors, in your opinion?
9. Being a GP, what would you need to improve your clinical reasoning when it comes to patients suffering from multimorbidity?
10. What do you think the medical students would need to improve this type of reasoning?
