# Supplementary material for: Hacia un delito publicitario
Source: HighWire-hosted journal article supplement (doi:10.1136/fmch-2020-000798), 1992-01-01
Supplement: fmch-2020-000798supp003_data_supplement.pdf [file fmch-2020-000798supp003_data_supplement.pdf]

## Clinical reasoning processes: a graphical representation

Supplementary file 3:

Clinicians find it difficult to describe their clinical reasoning processes. Charlin's et al. model to which we refer is one of the most interesting frameworks published in recent years. You will find in this file a link to the interactive model of Charlin whereby you can click on each step of process to better explicit what is at play.

<https://edugenie.com/prc2015/>

Charlin B, Lubarsky S, Millette B, Crevier F, Audétat M, Charbonneau A, et al. Clinical reasoning processes: unraveling complexity through graphical representation. *Medical education*. 2012 ;46:454–63.
